# Supplementary material
Source: PubMed Central journal article supplement (PMC3431715)
Supplement: supp_M112.377960_jbc.M112.377960-1.pdf [file supp_M112.377960_jbc.M112.377960-1.pdf]

## Supplemental Experimental procedures

*Thermodynamic analysis* - Thermodynamic experiments were performed using a Biacore T100 biosensor over a temperature range of 4°C to 40°C. Data were fitted to the integrated non-linear form of van't Hoff equation (Zhukov, A., & Karlsson, R. (2007). Statistical aspects of van't Hoff analysis: a simulation study. *J. Mol. Recognit.* **20**, 379-385) (Figure S1):

$$\ln K_a(T) = \ln K_a(T_0) + \left[ \frac{-\Delta H(T_0) + \Delta C_p T_0}{R} \right] \times \left( \frac{1}{T} - \frac{1}{T_0} \right) + \frac{\Delta C_p}{R} \times \ln \left( \frac{T}{T_0} \right) \quad (1)$$

where R is the gas constant, T<sub>0</sub> is a reference temperature, commonly 298 K, K<sub>A</sub>(T<sub>0</sub>) and ΔH°(T<sub>0</sub>) - association binding constant and binding enthalpy at T<sub>0</sub>, and ΔC<sub>p</sub> is a heat capacity increment. In several cases, where the relationship lnK<sub>A</sub> vs. 1/T assumed strictly linear form, the heat capacity contribution was virtually equal to zero and the relationship was described by a more simple form of the same equation:

$$\ln K_a(T) = \ln K_a(T_0) + \left[ \frac{-\Delta H(T_0)}{R} \right] \times \left( \frac{1}{T} - \frac{1}{T_0} \right) \quad (2)$$

Confidence probability of 0.95 was used for fitting. The fitting was performed using Microcal Origin 7 software.

*Reporter gene assay* - The effect of different ALK1 mutations on BMP9 and BMP10 signaling was evaluated in human glioblastoma T98G cells. Briefly, TG98 cells were co-transfected with pGL3-BRE reporter plasmid containing firefly luciferase gene controlled by SMAD1/5/8 and pRL-CMV-luc plasmid containing Renilla luciferase controlled by a constitutively active CMV promoter at a 20:1 ratio. Cells were incubated for 16 hours at 37°C with BMP9 (600 pg/mL) or BMP10 (350 pg/mL) with or without ALK1 mutants. Cells were lysed, assayed using a Dual-Luciferase reporter assay kit (Promega) and results expressed as a ratio of firefly over Renilla luciferase activity in relative light units.

*Cooperativity experiment performed by SPR* – ALK1<sup>ECD</sup>-BMP9 complex was formed by mixing BMP9 with ALK1<sup>ECD</sup>-hFc. Pre-assembled complex was captured on anti-hFc IgG Biacore chip. Different concentrations of ActRIIB<sup>ECD</sup>-mFc were injected over captured pre-assembled binary ALK1-BMP9 complex. Kinetic parameters for ActRIIB binding to binary ALK1-BMP9 complex were compared with kinetic parameters of ActRIIB binding to BMP9. In a separate experiment assay was flipped and ActRIIB<sup>ECD</sup>-BMP9 complex was formed by mixing BMP9 with ActRIIB<sup>ECD</sup>-mFc. Assembled binary complex was captured on anti-mFc IgG Biacore chip.

Different concentrations of ALK1<sup>ECD</sup>-hFc were injected over captured binary ActRIIB-BMP9 complex. Kinetic parameters for ALK1 binding to binary ActRIIB-BMP9 complex were compared with kinetic parameters of ALK1 binding to BMP9.

#### **Supplemental Figures:**

**Supplemental Figure 1. Van't Hoff plots for (A) BMP9 and (B) BMP10 binding to ALK1<sup>ECD</sup>-Fc, ActRIIB<sup>ECD</sup>-Fc and ActRIIA<sup>ECD</sup>-Fc.**

**Supplemental Figure 2. Higher order assembly in the ALK1<sup>ECD</sup>-BMP9-ActRIIB<sup>ECD</sup> crystal structure** Asn<sup>24</sup> on ActRIIB facilitates dimerization of two ternary complexes via the attached N-acetyl-glucosamine (NAG).

**Supplemental Figure 3. Comparison of ALK1 with ALK3 and ALK6** (A) Structure-based sequence alignment of ALK1, ALK3 and ALK6, showing residues involved in ligand recognition. Polar (red) and hydrophobic (grey) contacts are highlighted. (B) Peeled-away surface of ALK1, ALK3 and ALK6 mapping residues involved in ligand recognition (colored as in A).

**Supplemental Figure 4. Sequence alignment of BMP9 with select TGF- $\beta$  ligands.** BMP9 residues at the ALK1 and ActRIIB interface are highlighted. Asterisks denote key specificity determinants.

**Supplemental Figure 5. The ActRIIB/BMP9 interface.** Interactions within (A) the conserved ActRIIB hydrophobic binding pocket and (B) surrounding interface are highlighted.

**Supplemental Figure 6. Binding of type I and type II receptor ECDs in ALK1-BMP9-ActRIIB complex is independent.** To measure possible cooperativity binding of ActRIIB<sup>ECD</sup> to pre-assembled ALK1<sup>ECD</sup>-BMP9 binary complex (A) was compared to binding of ActRIIB<sup>ECD</sup> to BMP9 (B). Assay was flipped and binding of ALK1 to pre-assembled ActRIIB<sup>ECD</sup>-BMP9 complex (C) was compared to binding of ALK1<sup>ECD</sup> to BMP9 (D).

#### **Supplemental Tables:**

**Supplemental Table 1: Crystallographic data collection and refinement statistics.**

**Supplemental Table 2: Interactions at the ALK1/BMP9 interface.**

**Supplemental Table 3: Interactions at the ActRIIB/BMP9 interface.**

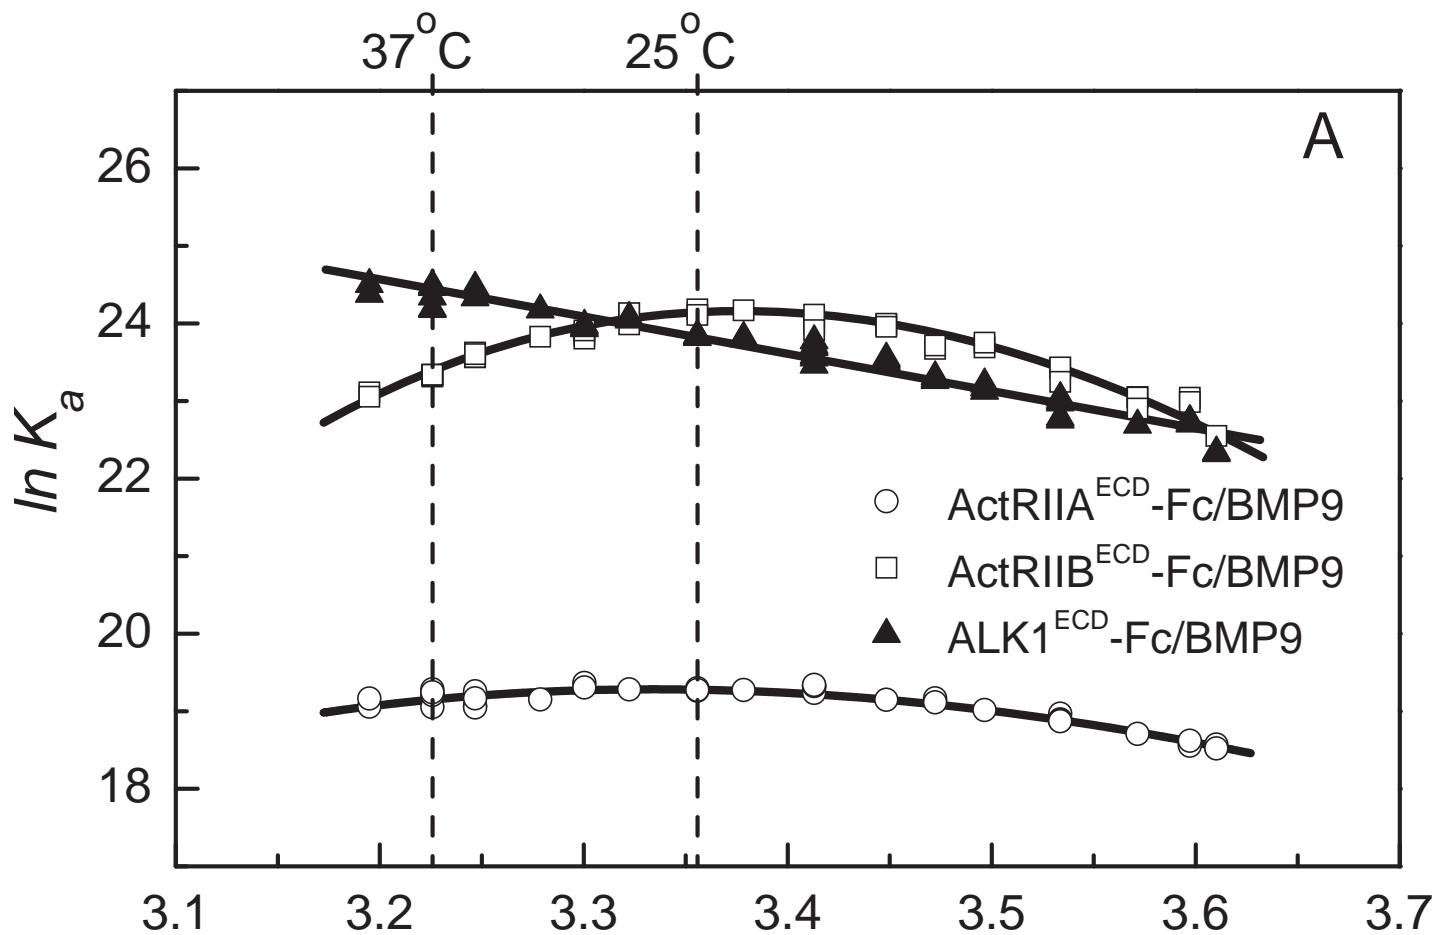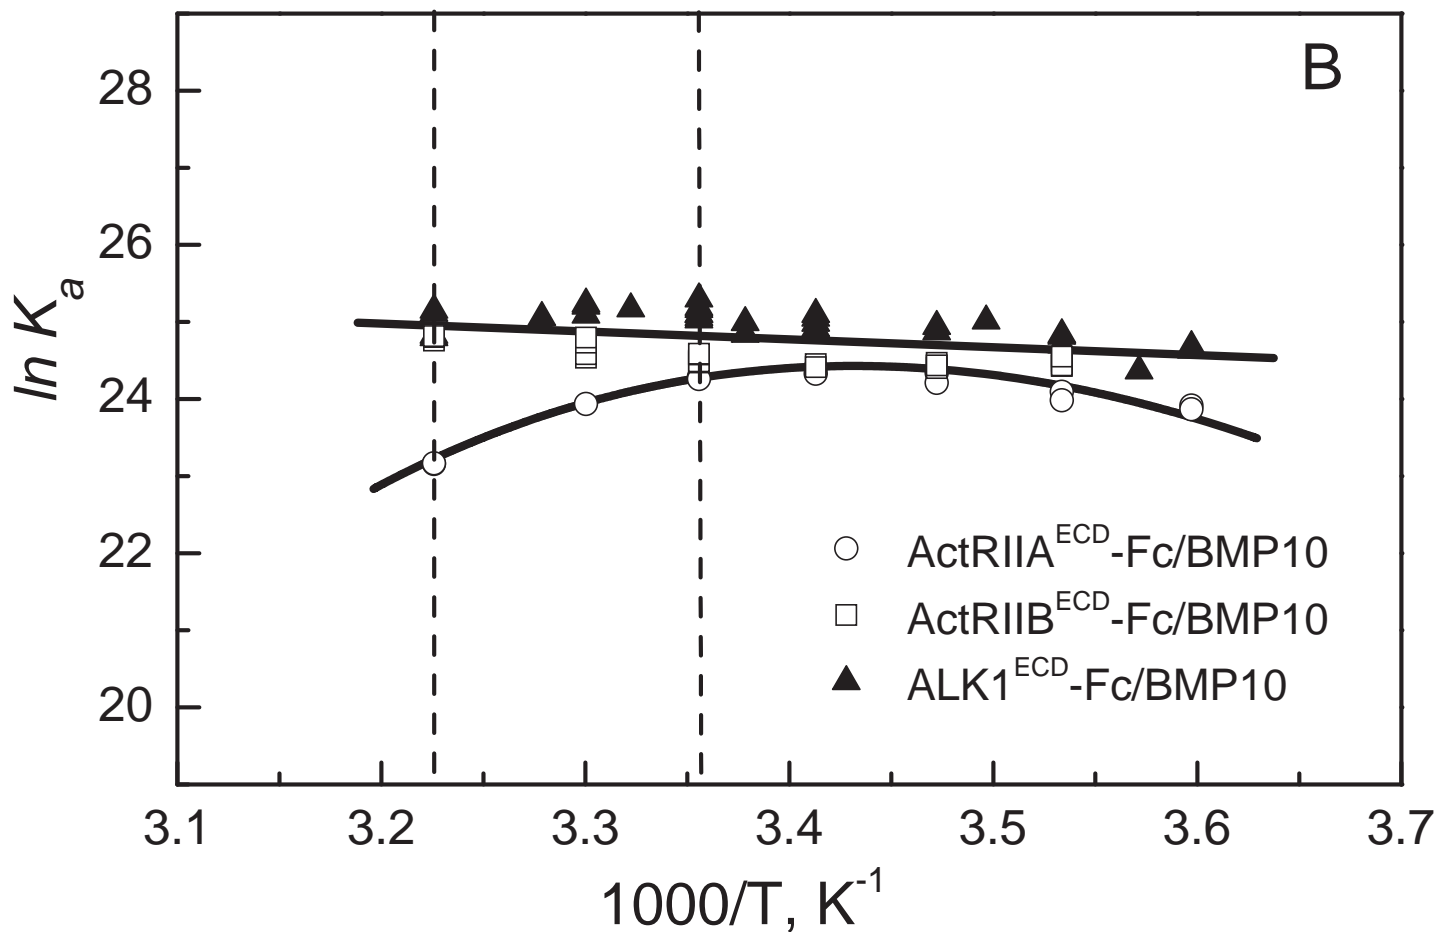

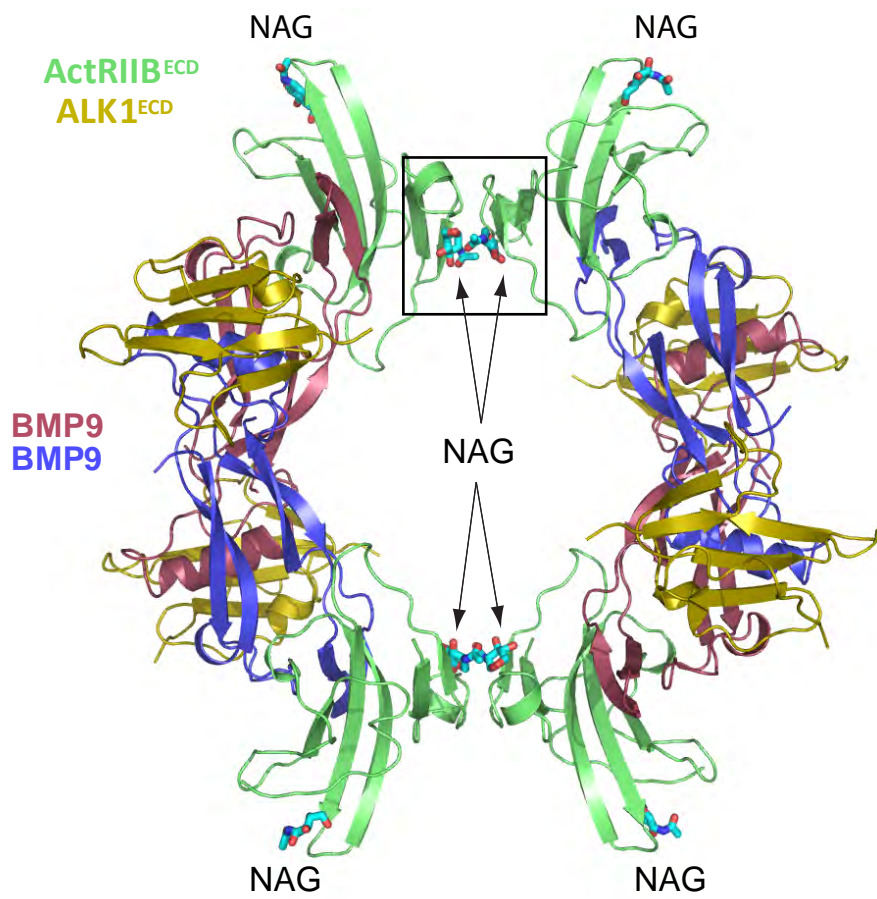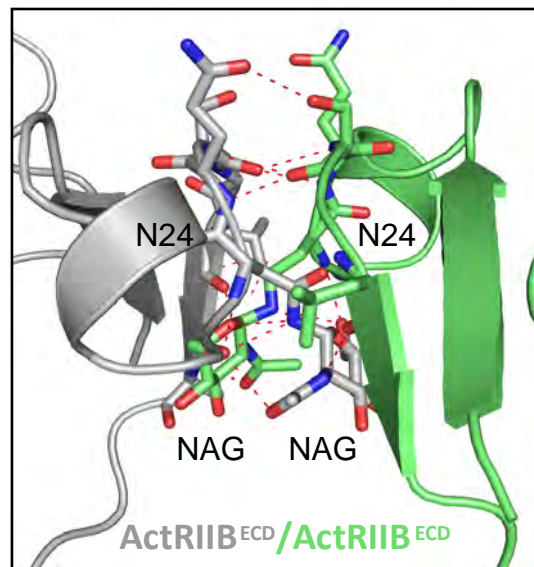

**A**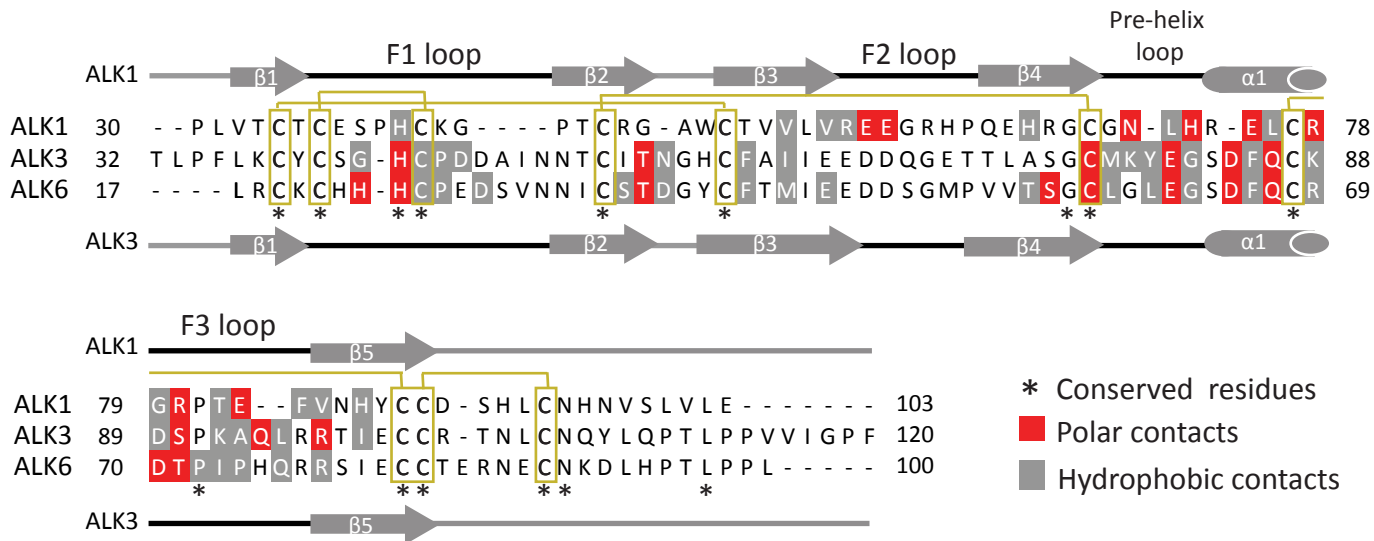**B**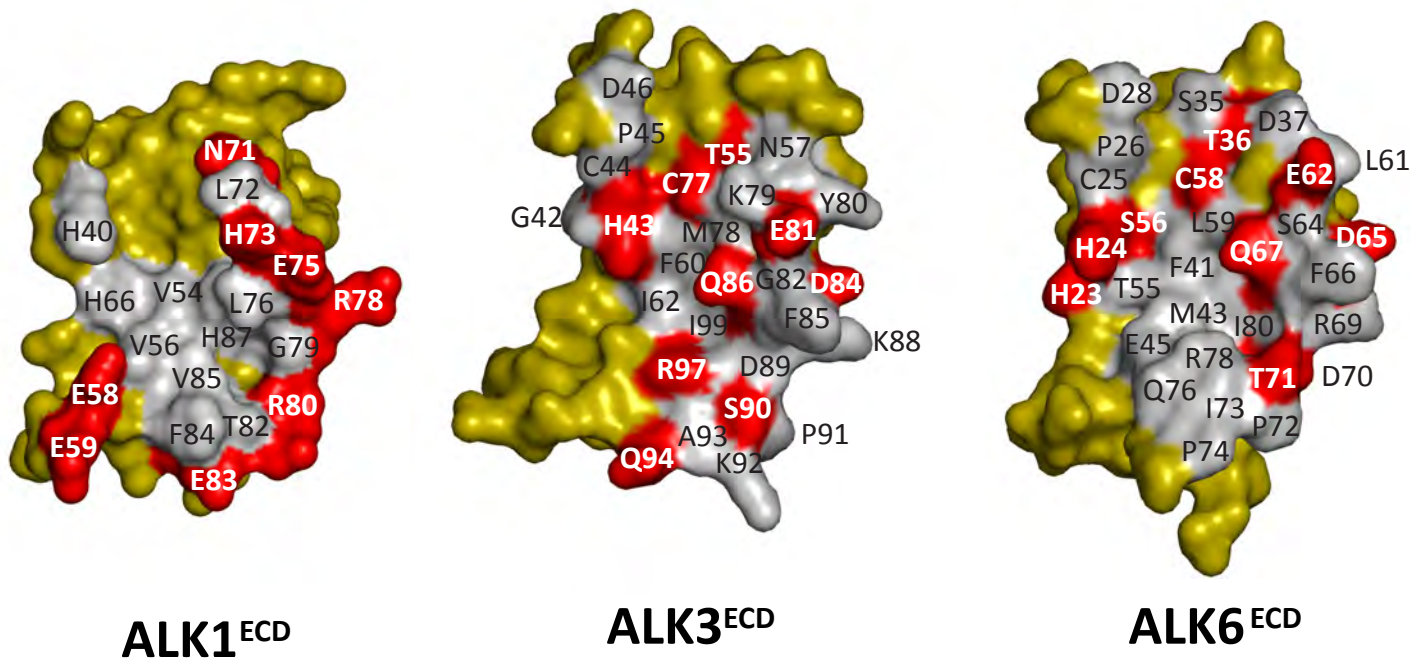

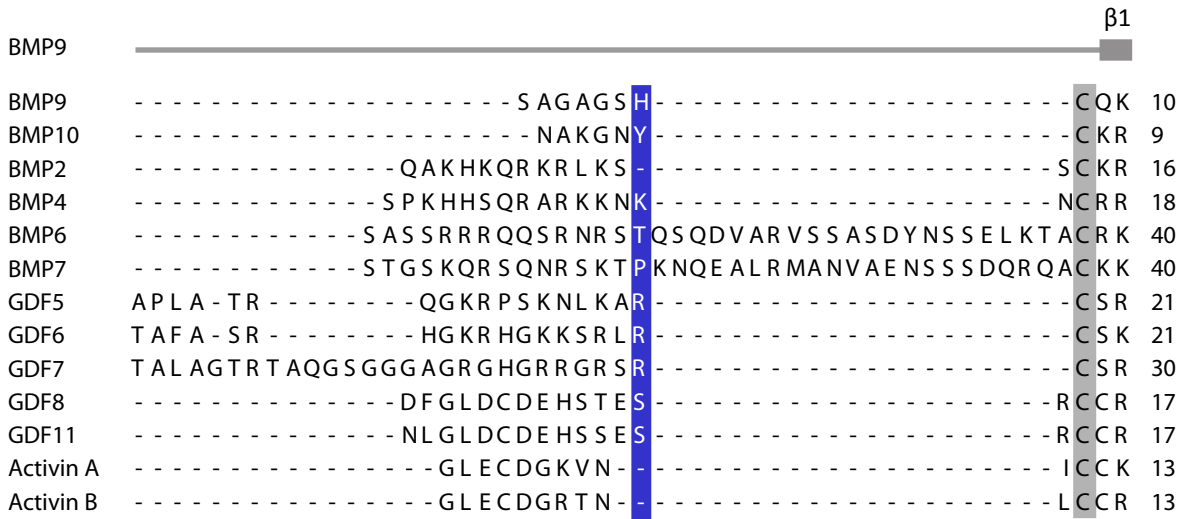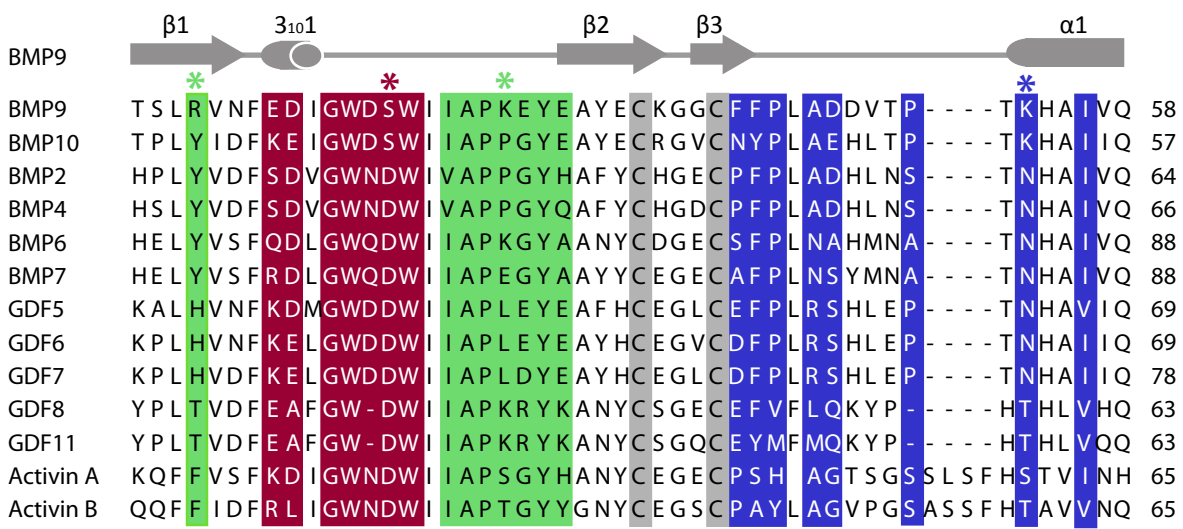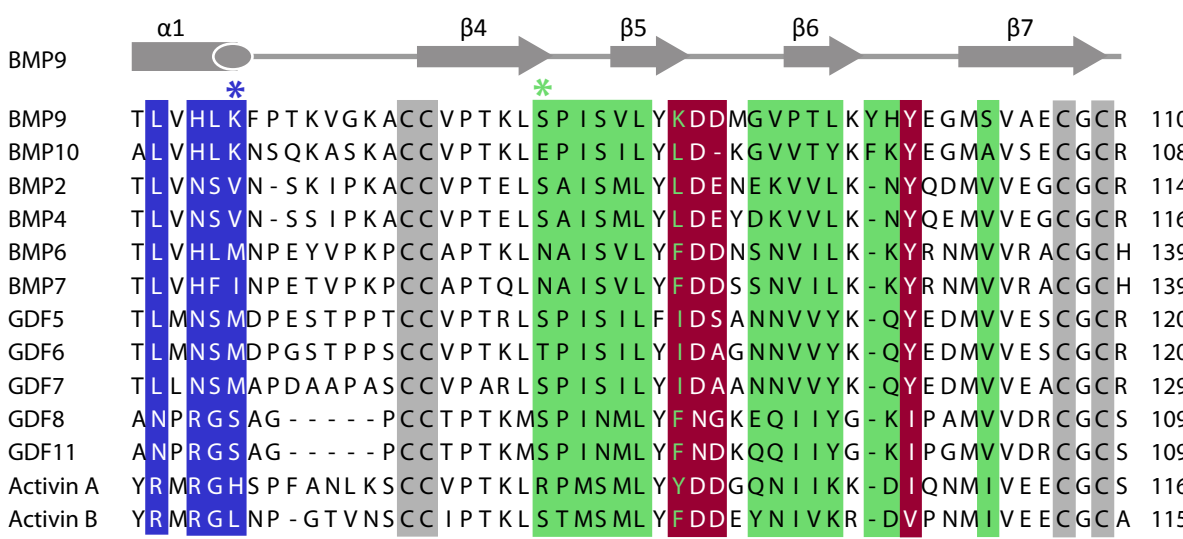

■ ALK1 contacts (BMP9)     
 ■ ALK1 contacts (BMP9)     
 ■ ActRIIB contacts

Supplemental Figure 4

**A**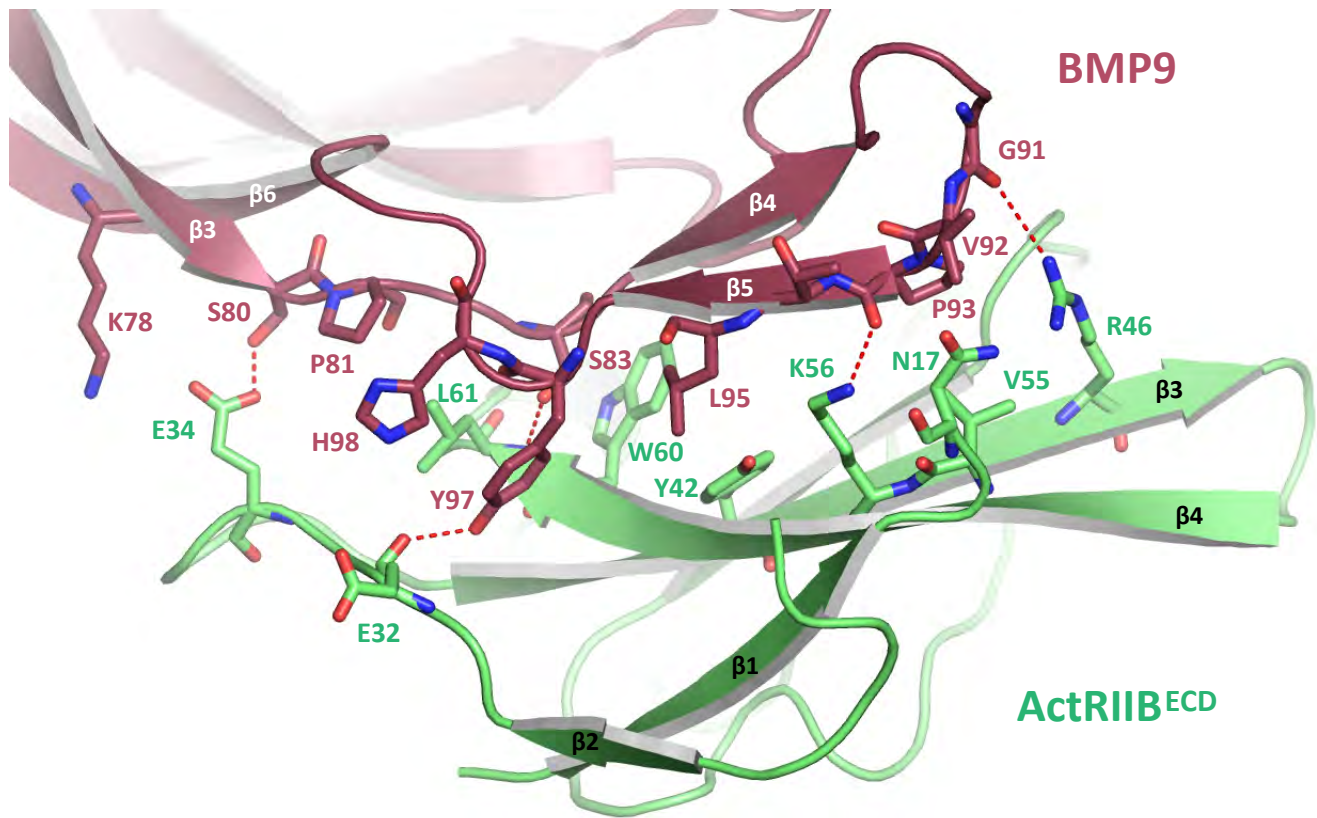**B**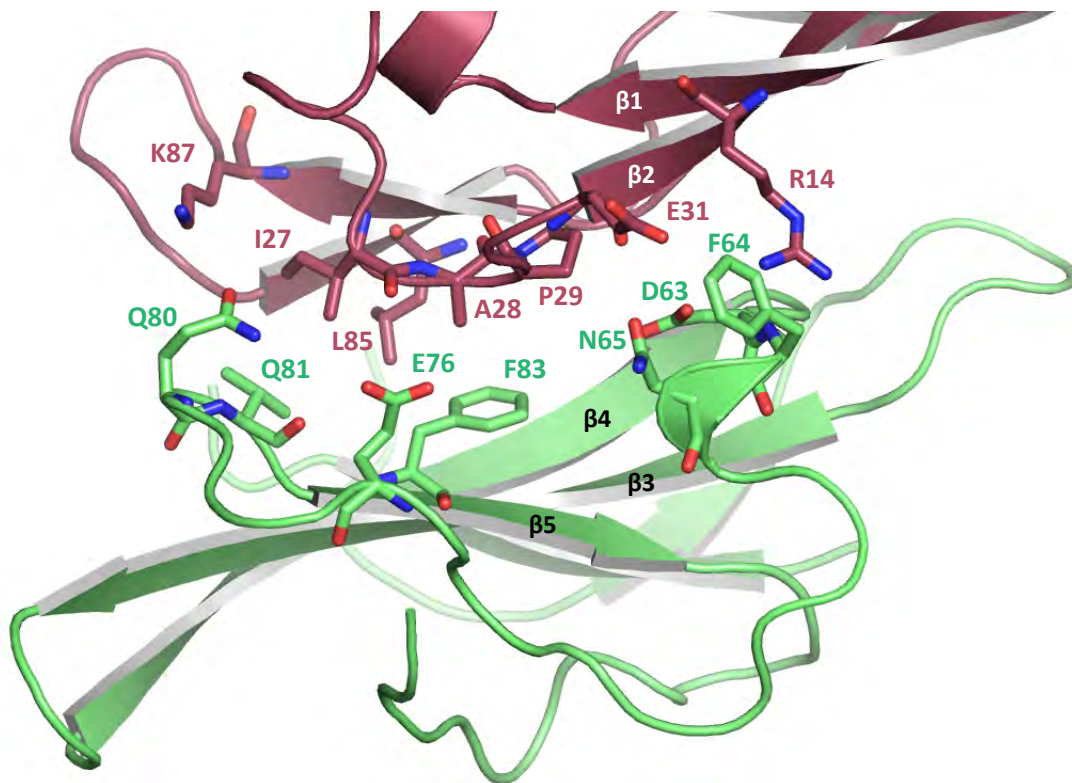

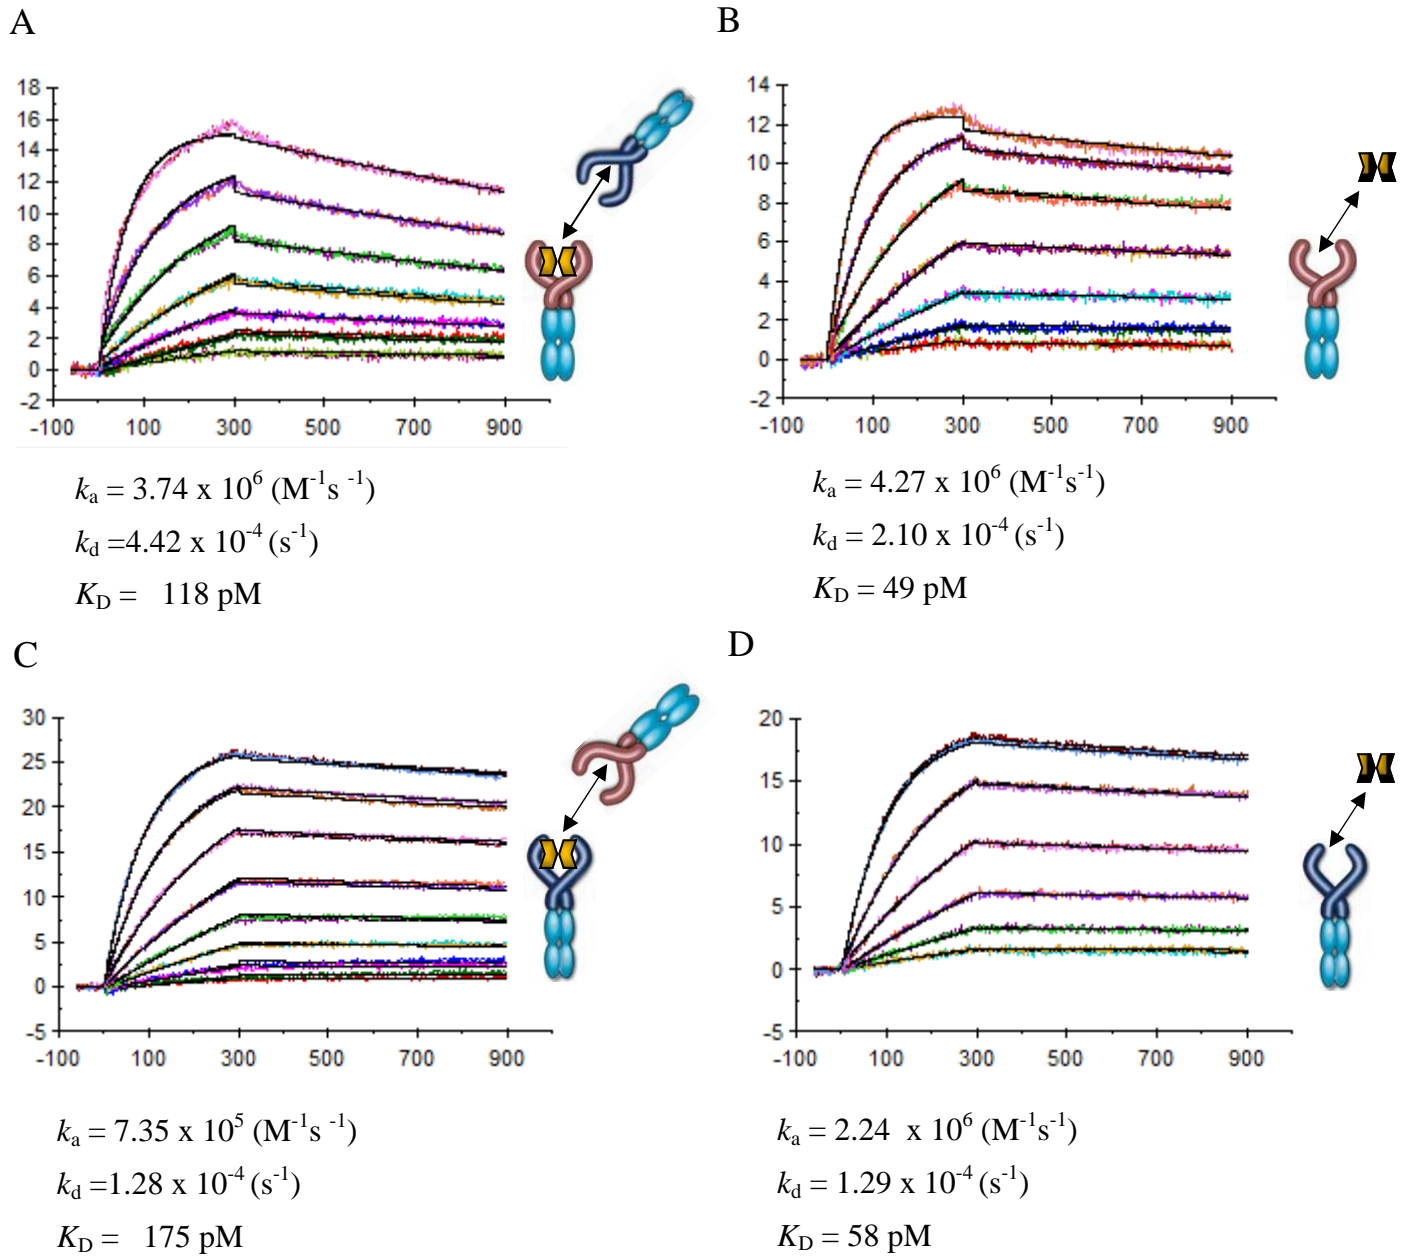

Supplemental Figure 6



---

## Supplemental Table 1: Crystallographic Data

---

### Data collection Statistics

|                                    |                        |
|------------------------------------|------------------------|
| Space group                        | P3 <sub>1</sub> 12     |
| Cell dimensions                    |                        |
| <i>a</i> , <i>b</i> , <i>c</i> (Å) | 216.45, 216.45, 216.95 |
| α, β, γ (°)                        | 90.00, 90.00, 120.00   |
| Wavelength (Å)                     | 1.54                   |
| Resolution (Å)                     | 26.8- 3.35 (3.41-3.35) |
| <i>R</i> <sub>merge</sub>          | 0.137 (0.372)          |
| <i>I</i> / σ <i>I</i>              | 20.9 (4.7)             |
| Completeness (%)                   | 99.5 (99.4)            |
| Redundancy                         | 5.8 (3.9)              |

### Refinement Statistics

|                                                     |            |
|-----------------------------------------------------|------------|
| Resolution (Å)                                      | 26.8 -3.35 |
| No. of Reflections                                  | 69520      |
| <i>R</i> <sub>work</sub> / <i>R</i> <sub>free</sub> | 21.9/26.1  |
| Average B (Å <sup>2</sup> )                         | 78         |
| Rmsd bond lengths (Å)                               | 0.014      |
| Rmsd bond angles (°)                                | 1.2        |

---

Numbers in parentheses correspond to highest resolution shell

$$R_{\text{merge}} = \frac{\sum |I - \langle I \rangle|}{\sum \langle I \rangle}$$

$R_{\text{work}} = \frac{\sum ||F_{\text{obs}}| - |F_{\text{calc}}||}{\sum |F_{\text{obs}}|}$  where  $F_{\text{obs}}$  and  $F_{\text{calc}}$  are the observed and calculated structure factors respectively.

$R_{\text{free}}$  was calculated from a subset of reflections (5%) not used for refinement.

**Supplemental Table 2:** Interactions ( $d \leq 4.5 \text{ \AA}$ ) at the BMP9/ALK1 interface

| BMP9/ALK1 Site I |                                      | BMP9/ALK1 Site II  |                                             |
|------------------|--------------------------------------|--------------------|---------------------------------------------|
| ALK1             | BMP9                                 | ALK1               | BMP9                                        |
| His40            | His7, Ala46                          | Arg78              | Ser24, Trp25, <b>Lys87, Asp88, Asp89</b>    |
| Val54            | Phe43, Pro44                         | Gly79              | Gly21                                       |
| Val56            | Phe43, Leu63                         | Arg80              | <b>Glu18, Gly21, Asp23</b>                  |
| Arg57            | Leu63                                | Thr82              | Asp19, Gly21                                |
| Glu58            | <b>Phe42</b> , Phe43, His62<br>Leu63 | Glu83              | Asp19, <b>Lys64</b>                         |
| Glu59            | Phe42, His62, Leu63,<br><b>Lys71</b> | Phe84              | Asp19, Lys64                                |
| His66            | Pro44                                | BMP9/ALK1 Site III |                                             |
| Asn71            | <b>Asp47</b>                         | ALK1               | BMP9                                        |
| Val80            | Phe43                                | Leu72              | Asp47, Pro51                                |
| His87            | Phe43, Pro44                         | His73              | <b>Pro51</b> , Lys53, Ile56                 |
|                  |                                      | Glu75              | <b>Lys53</b> , Trp22, Trp25<br><b>Tyr99</b> |
|                  |                                      | Leu76              | Phe43, Ile56, Leu60<br>Trp22                |

BMP9 Residues highlighted in bold are involved in polar contacts

**Supplemental Table 3:** Interactions ( $d \leq 4.5 \text{ \AA}$ ) at the BMP9/ActRIIB interface

| BMP9/ActRIIB |                                                | BMP9/ActRIIB |                                              |
|--------------|------------------------------------------------|--------------|----------------------------------------------|
| ActRIIB      | BMP9                                           | ActRIIB      | BMP9                                         |
| Asn17        | Val92                                          | Lys56        | <b>Pro93</b> , Thr94, Leu95                  |
| Glu21        | Thr94                                          | Cys59        | Leu95, Tyr97                                 |
| Cys31        | Tyr97                                          | Trp60        | Ala28, Pro29, Ser83,<br>Val84, Leu85, Leu95  |
| Glu32        | <b>Tyr97</b> , His98                           | Leu61        | Pro81, Ile82, <b>Ser83</b> ,<br>Tyr97, His98 |
| Glu34        | <b>Lys78</b> , <b>Ser80</b> , Pro81,<br>Ala105 | Asp63        | Pro29                                        |
| Lys37        | Ser80, Pro81, Ser103                           | Phe64        | Arg14, Glu31, Tyr32,<br>Glu33                |
| Leu39        | Tyr97                                          | Asn65        | Pro29, Glu31                                 |
| Tyr42        | Leu85, Leu95                                   | Glu76        | Lys30                                        |
| Ser44        | Leu85                                          | Gln80        | Ile27, Lys30, Lys87                          |
| Arg46        | <b>Gly91</b> , Pro93                           | Val81        | Ile27, Pro93                                 |
| Val55        | Pro93                                          | Phe83        | Ile27, Ala28, Leu85                          |

BMP9 Residues highlighted in bold are involved in polar contacts
